1 **Reconstitution of ribosome self-replication outside a living cell**

2

3 Yuishin Kosaka<sup>1,2</sup>, Yumi Miyawaki<sup>1</sup>, Megumi Mori<sup>1</sup>, Shunsuke Aburaya<sup>3</sup>, Mao  
4 Fukuyama<sup>4</sup>, Mitsuyoshi Ueda<sup>1,5</sup>, Wataru Aoki<sup>1,5,6,\*</sup>

5

6 <sup>1</sup> Division of Applied Life Sciences, Graduate School of Agriculture, Kyoto University,  
7 Kyoto, Japan

8 <sup>2</sup> Japan Society for the Promotion of Science, Kyoto, Japan

9 <sup>3</sup> Division of Metabolomics, Medical Institute of Bioregulation, Kyushu University,  
10 Fukuoka, Japan

11 <sup>4</sup> Institute of Multidisciplinary Research for Advanced Materials, Tohoku University,  
12 Sendai, Japan

13 <sup>5</sup> Kyoto Integrated Science & Technology Bio-Analysis Center, Kyoto, Japan

14 <sup>6</sup> JST FOREST, Tokyo, Japan

15

16 \* Correspondence should be addressed to Wataru Aoki.

17 E-mail address: [aoki.wataru.6a@kyoto-u.ac.jp](mailto:aoki.wataru.6a@kyoto-u.ac.jp)

18

19 **Summary**

20 **Ribosome biogenesis, a recursive process of pre-existing ribosomes self-replicating**  
21 **nascent ones, is pivotal in the self-replication of life. In *Escherichia coli*, three**  
22 **ribosomal RNAs (rRNAs) are transcribed, and 54 ribosomal proteins (r-proteins)**  
23 **are synthesized by pre-existing ribosomes as structural components<sup>1,2</sup>. They are**  
24 **cotranscriptionally assembled in a cooperative hierarchy under the support of**  
25 **~100 accessory factors<sup>1-3</sup>. The reconstitution of ribosome biogenesis outside a**  
26 **living cell is an essential goal to understand the self-replication of life. However,**  
27 **this goal could not have been achieved so far due to its complexity. Here, we report**  
28 **the successful *in vitro* reconstitution of the entire ribosome biogenesis process. We**  
29 **hypothesized that mimicking *in vivo* ribosome biogenesis<sup>1-6</sup> could result in *in vitro***  
30 **ribosome biogenesis. Specifically, we found that coactivating the transcription of**  
31 **an rRNA operon, as well as the transcription and translation of 54 r-protein genes**  
32 **encoding r-proteins, and the coordinated ribosomal assembly in a**  
33 **cytoplasm-mimicking reaction solution, resulted in highly efficient *in vitro***  
34 **reconstitution of ribosome biogenesis. Our achievement represents a critical step**  
35 **toward revealing fundamental principles underlying the self-replication of life and**  
36 **creating self-replicating artificial cells<sup>7</sup>. We also succeeded in engineering rRNA**  
37 **and r-proteins by only adding mutant ribosomal genes in the reaction, enabling**  
38 **high-throughput and unconstrained creation of artificial ribosomes with altered or**  
39 **enhanced functionality<sup>8-12</sup>.**

40

41 **Main**

42 Ribosome biogenesis is a recursive process in which ribosomes, the universal decoders  
43 of the genetic code, are self-replicated by pre-existing ribosomes. This process is pivotal  
44 in the self-replication of life and is universally conserved across living organisms. In  
45 *Escherichia coli*, three rRNAs (16S, 23S, and 5S) are transcribed by the RNA  
46 polymerase enzyme and 54 r-proteins are synthesized by pre-existing ribosomes as  
47 structural components<sup>1,2</sup>. They are cotranscriptionally assembled in a cooperative  
48 hierarchy through multiple parallel assembly pathways<sup>13-22</sup>. The assembly process is  
49 supported, modified, and modulated by ~100 accessory factors<sup>1,2</sup>. All these steps  
50 concurrently occur in the cytoplasmic space in a highly coordinated manner, resulting in  
51 the synthesis of the 2.5-MDa 70S ribosome, consisting of the 30S small and 50S large  
52 subunits (SSU and LSU, respectively), in a few minutes<sup>23</sup>. The SSU and LSU are  
53 essential for translation and contain the decoding and the peptidyl transferase center,  
54 respectively. Ribosomes play multifaceted roles in healthy cells, and ribosome  
55 biogenesis dysregulation leads to the development of various aberrant states such as cell  
56 death and cancer<sup>24</sup>.

57 Reconstituting ribosome biogenesis outside a living cell is an essential goal in  
58 biology to understand the self-replication of life. Intensive scientific efforts have been  
59 invested in achieving this goal for decades. Ribosome assembly mapping revealed  
60 assembly order and intermediates, as well as thermodynamic and kinetic parameters<sup>25-27</sup>.  
61 The *in vitro* integrated synthesis, assembly, and translation (iSAT) realized the coupling  
62 of rRNA synthesis and ribosome assembly using purified r-proteins<sup>4,5,28,29</sup>. These efforts  
63 in nonautonomous ribosome assembly with purified r-proteins encouraged attempts to  
64 reconstitute ribosome biogenesis *in vitro*. A study describes an attempt to cogenerate

65 r-proteins from DNA templates in an *in vitro* one-pot reaction<sup>30</sup>. Another study  
66 conducted simultaneous expression of SSU structural components and certain accessory  
67 factors on a chip in an attempt to reconstitute SSU biogenesis<sup>31</sup>. The latter study  
68 reproduced hallmarks of SSU biogenesis on a chip; however, nascent SSU activity as  
69 the decoding center was not confirmed<sup>31</sup>. To the best of our knowledge, reconstitution  
70 of LSU biogenesis, a far more complex process than SSU biogenesis<sup>2</sup>, has not even  
71 been attempted yet. Hence, a big leap needs to be made forward to reconstitute  
72 ribosome biogenesis *in vitro*.

73         In this study, we report the first successful *in vitro* reconstitution of the entire  
74 ribosome biogenesis process in *E. coli*. We hypothesized that mimicking the *in vivo*  
75 ribosome biogenesis process<sup>1,2,4,5</sup> and cytoplasmic chemical conditions<sup>4,6</sup> could result in  
76 *in vitro* ribosome biogenesis. Specifically, our approach involved coactivating the  
77 transcription of an operon encoding three rRNAs, the transcription and translation of 54  
78 genes encoding r-proteins, and the coordinated assembly of ribosomes in an optimized  
79 *E. coli* S150 cell extract, containing the ~100 accessory factors for ribosome biogenesis  
80 and imitating cytoplasmic chemical conditions. To test our hypothesis, we developed a  
81 highly specific, sensitive reporter assay to detect the translational activity of nascent  
82 ribosomes. The reporter assay allowed for the stepwise, combinatorial exploration of the  
83 reaction conditions, leading us to successful reconstitution of the entire ribosome  
84 biogenesis process *in vitro*, that is, autonomous self-replication of the 2.5-MDa 70S  
85 ribosome by concurrent transcription, translation, processing, modification, modulation,  
86 and assembly in a single reaction space. The reconstituted *in vitro* ribosome biogenesis  
87 allows us for more freedom in controlling the process of ribosome biogenesis. Therefore,  
88 this achievement would generate a widespread impact on understanding the

89 self-replication of life, elucidating the ribosome assembly process<sup>1,2</sup>, revealing the  
90 multifaceted roles of ribosome biogenesis in cell physiology<sup>24</sup>, creating self-replicating  
91 artificial cells<sup>7</sup>, and designing artificial ribosomes with altered or enhanced  
92 functionalities<sup>8-12</sup>.

93

#### 94 **Development of a highly specific reporter assay for nascent ribosome detection**

95 In an attempt to reconstitute ribosome biogenesis *in vitro*, a highly specific reporter  
96 assay for detection of the nascent ribosome translational activity would be required as  
97 pre-existing and nascent ribosomes would coexist in a single reaction space.  
98 Translational efficiency is mainly determined by the RNA–RNA base pairing between  
99 the Shine–Dalgarno (SD) and anti-Shine–Dalgarno (ASD) sequences of mRNA and the  
100 16S rRNA, respectively<sup>32</sup>. Therefore, generation of new SD and ASD leads to the  
101 development of orthogonal translation systems<sup>33-36</sup> useful for detecting nascent artificial  
102 ribosomes (**Fig. 1a**). Among them, a two-sided orthogonal translation system would be  
103 superior in specificity and sensitivity. A previous study described that certain pairs of  
104 orthogonal SDs and ASDs (oSDs and oASDs, respectively) exhibit two-sided  
105 orthogonality in *E. coli*<sup>34</sup>. However, whether any oSD·oASD pairs exhibit two-sided  
106 orthogonality *in vitro* remains elusive<sup>28</sup>.

107 We selected seven oSD·oASD pairs<sup>34-36</sup> (named a, b, c, d, or1, or4, and j) as  
108 candidates to screen two-sided orthogonal translation systems available in *E. coli* cell  
109 extracts (**Supplementary Information 1**). First, we designed an experimental scheme  
110 to select oSDs that do not interact with native ribosomes in the cell extracts and  
111 designed fluorescent reporter constructs for each member of the selected candidate pairs  
112 (**Fig. 1b**). Either a WT-SD–sfGFP or an oSD–sfGFP reporter was mixed with two types

113 of cell extracts (sonicated S12 or French press S30) containing native ribosomes. We  
114 observed that six oSDs (b, c, d, or1, or4, and j) did not show any functional interaction  
115 with the native ribosomes (**Fig. 1c**). Both cell extracts showed similar profiles; hence,  
116 we used the S12 extracts for the following screening processes due to their ease of  
117 preparation. We thus further investigated the orthogonality of the top four oSDs (b, or1,  
118 or4, and j) using LacZ reporters that were more sensitive than the GFP reporters, and  
119 discovered that three oSDs (b, or1, and or4) displayed strong orthogonality against the  
120 native ribosomes (**Fig. 1d**).

121 Next, we designed an experimental scheme to screen oSD-oASD pairs with  
122 two-sided orthogonality in cell extracts (**Fig. 1e**). We prepared functional cell extracts  
123 using *E. coli* expressing an artificial rRNA operon with WT-ASD or oASD (b, or1, or  
124 or4) and C1192U spectinomycin resistance (SpcR)<sup>37</sup> in the 16S rRNA (**Extended Data**  
125 **Fig. 1a**). The cell extracts containing artificial ribosomes with b-, or1-, or or4-oASD did  
126 not generate reporter signals when mixed with the WT-SD-LacZ reporter and  
127 spectinomycin (**Fig. 1f and Extended Data Fig. 1b**). When mixed with the cognate  
128 oSD-LacZ reporter and spectinomycin, the cell extract containing artificial ribosomes  
129 with or1-oASD generated a strong reporter signal (**Fig. 1g**). We verified in a follow-up  
130 control experiment that the reporter signal certainly derived from the or1-oSD-oASD  
131 pairing (**Extended Data Fig. 1c**). These results showed that the or1-oSD-oASD pair  
132 exhibited strong two-sided orthogonality in the cell extracts. We have not pursued the  
133 reason why b- and or4-oSD-oASD pairs were nonfunctional (**Fig. 1g**). A potential  
134 explanation is that our expression vectors did not allow the expression of the artificial  
135 rRNAs with b- or or1-oASD in *E. coli*.

136 Encouraged by the success to develop the highly specific reporter assay, we  
137 conducted a preliminary trial to reconstitute SSU biogenesis *in vitro*. We coactivated the  
138 transcription of the artificial rRNA operon with *orl*-oASD and SpcR, the transcription  
139 and translation of 21 SSU r-protein genes, and the coordinated assembly in an  
140 optimized S150 cell extract, containing the ~100 accessory factors for ribosome  
141 biogenesis and imitating cytoplasmic chemical conditions. However, we observed no  
142 nascent SSU-derived reporter signal (**Extended Data Fig. 2**), confirming the difficulty  
143 to reconstitute such a complex process *in vitro*. Therefore, we conceived that a highly  
144 sensitive assay would also be required to detect the translational activity of nascent  
145 ribosomes to explore the reaction conditions which would enable ribosome biogenesis  
146 *in vitro*.

147

#### 148 **Highly sensitive detection of the artificial ribosome translational activity**

149 We devised a deep-learning-assisted automated femtoliter droplet assay for sensitive,  
150 scalable, and objective detection of the artificial ribosome translational activity. A  
151 femtoliter droplet assay, in which a tiny amount of the reaction solution is confined to  
152 femtoliter droplets, allows for highly sensitive enzymatic activity detection<sup>38</sup> (**Fig. 2a**).  
153 However, scalable and objective femtoliter droplet assay analysis is generally difficult  
154 as the bright-field images of the droplets have an extremely low contrast, hampering  
155 precise droplet segmentation. To address this problem, we developed a  
156 deep-learning-assisted automated analysis pipeline (**Fig. 2b**), using a trained U-Net<sup>39</sup>  
157 deep-learning model to transform bright-field droplet images into binary segmented  
158 images (droplet or background) with >90 % accuracy (**Extended Data Fig. 3**). We used

159 the binary segmented images to extract area, fluorescence intensity, and other features  
160 of each droplet by automated particle analysis using ImageJ<sup>40</sup>.

161 Next, we evaluated the sensitivity of the deep-learning-assisted automated  
162 femtoliter droplet assay. We prepared two types of S12 cell extracts: one contained  
163 native ribosomes and 4.9  $\mu\text{M}$  of artificial ribosomes with or1-oASD and SpcR  
164 (**Extended Data Fig. 4**), and the other was a control cell extract containing only native  
165 ribosomes. We performed a control experiment by mixing the control cell extract with  
166 the or1-oSD–LacZ reporter. Unexpectedly, we observed native ribosome-derived  
167 fluorescence (**Extended Data Fig. 5a**), not detected in the bulk assay (**Fig. 1d**),  
168 indicating the high sensitivity of the femtoliter droplet assay. We observed that 100  $\mu\text{M}$   
169 spectinomycin supplementation in the reaction solution enabled us to specifically detect  
170 the artificial ribosome translational activity (**Extended Data Fig. 5a and b**). Then, to  
171 evaluate the sensitivity of the assay, we diluted the cell extract containing the artificial  
172 ribosomes using the control cell extract and mixed it with the or1-oSD–LacZ reporter  
173 and 100  $\mu\text{M}$  spectinomycin. As a result, we successfully detected the translational  
174 activity of the artificial ribosomes even at 49 pM (dilution ratio of  $10^5$ ) (**Fig. 2c**). Our  
175 Poisson distribution-based calculation suggested that the assay enabled translational  
176 activity detection down to the single ribosome level (**Extended Data Fig. 6**).

177

### 178 **Reconstitution of SSU biogenesis *in vitro***

179 We tackled again the reconstitution of SSU biogenesis *in vitro* using the two-sided  
180 orthogonal translation system and the deep-learning-assisted automated femtoliter  
181 droplet assay. We hypothesized that mimicking *in vivo* ribosome biogenesis would  
182 result in *in vitro* ribosome biogenesis. Our experimental scheme was divided into two



183 sequential reactions (**Fig. 3a**). In the first reaction, we aimed at coactivating the  
184 transcription of the artificial rRNA operon with orl-oASD and SpcR, the transcription  
185 and translation of 21 SSU r-protein genes, and the coordinated assembly in an  
186 optimized S150 cell extract, containing the ~100 accessory factors for ribosome  
187 biogenesis and imitating cytoplasmic chemical conditions. The second reaction was  
188 designed for detecting nascent artificial SSU translational activity using the  
189 orl-oSD–LacZ reporter. We observed no reporter signal during the initial trial for  
190 reconstituting SSU biogenesis even using the deep-learning-assisted automated  
191 femtoliter droplet assay, confirming again the difficulty to reconstitute SSU biogenesis  
192 (**Extended Data Fig. 7a**). Then, we thoroughly explored the reaction conditions using a  
193 simplex-lattice design and optimized the concentrations of the native ribosomes, the  
194 artificial rRNA operon, and 21 SSU r-protein genes. We hypothesized that increasing  
195 ribosomal gene concentrations could be beneficial to reconstituting SSU biogenesis as  
196 higher DNA concentrations usually produce robust expression profiles<sup>41</sup> (**Extended**  
197 **Data Fig. 4a**). However, contrary to our expectations, reducing their concentrations was  
198 pivotal and led to slight reporter signal detection (**Fig. 3b**). We conducted a follow-up  
199 optimization and successfully optimized the reaction conditions that generated almost  
200 saturated reporter signals in the femtoliter droplet assay (**Fig. 3c and Extended Data**  
201 **Fig. 7b**). Using the optimized reaction condition, we detected a strong, reconstituted  
202 SSU biogenesis-derived fluorescence signal even in the bulk assay (**Fig. 3d**). This  
203 fluorescence signal was stronger than that derived from the nonautonomous iSAT  
204 assembly, suggesting that the autonomous *in vitro* ribosome self-replication is highly  
205 efficient.

206

207 **Reconstitution of LSU biogenesis *in vitro***

208 We moved ahead to reconstitute LSU biogenesis *in vitro*. Our experimental scheme was  
209 similar to that for SSU (**Fig. 4a**). The first reaction consisted of coactivating the  
210 transcription of an artificial rRNA operon with A2058U clindamycin resistance  
211 (CldR)<sup>42</sup> in the 23S rRNA, the transcription and translation of 33 LSU r-protein genes,  
212 and the coordinated assembly in the optimized S150 cell extract. The second reaction  
213 was designed for detecting nascent artificial LSU translational activity using the  
214 WT-SD-LacZ reporter in the presence of 1.5 mM clindamycin. We expected that  
215 detection of the nascent artificial LSU translational activity would be difficult for three  
216 reasons: 1) LSU biogenesis is far more complex than SSU biogenesis<sup>2</sup>; 2) the two-sided  
217 orthogonal translation system is not available as the nascent artificial LSU requires  
218 native SSU for translation, the nascent artificial LSU could thus translate both LacZ and  
219 33 LSU r-proteins; 3) ribosomes with the A2058U CldR mutation retain only ~30 % of  
220 their translational activity in the presence of clindamycin<sup>12</sup>. Surprisingly, a simple  
221 exploratory experiment based on the optimized reaction condition for the reconstituted  
222 SSU biogenesis enabled us to detect significant fluorescence signals derived from the  
223 nascent artificial LSU (**Fig. 4bc**). As expected, the fluorescence signal obtained from  
224 the reconstituted LSU biogenesis was lower than that from the reconstituted SSU  
225 biogenesis (**Fig. 3d and 4c**). Using an improved LacZ reporter with a modified 5'UTR  
226 sequence, we successfully enhanced by 3.8-fold the nascent artificial LSU-derived  
227 fluorescence signal (**Fig. 4d**).

228 We tried to obtain further pieces of evidence that ensure the successful  
229 reconstitution of SSU and LSU biogenesis. We investigated r-protein production  
230 profiles using heavy L-arginine (<sup>13</sup>C<sub>6</sub>, <sup>15</sup>N<sub>4</sub>) and L-lysine (<sup>13</sup>C<sub>6</sub>, <sup>15</sup>N<sub>2</sub>) to label nascent

231 r-proteins during the reconstituted SSU and LSU biogenesis. Our mass spectrometric  
232 analyses revealed that nascent r-proteins derived from the plasmids encoding r-proteins  
233 but not from residual *E. coli* chromosomal fragments or mRNAs in the S150 cell  
234 extracts (**Extended Data Fig. 8a**). Furthermore, we conducted a reconstitution  
235 experiment using a mutant r-protein gene encoding uS12 K43T, which confers  
236 streptomycin resistance (StrR) to ribosomes<sup>28,43</sup>. We observed that the reporter signals  
237 remained unaffected by streptomycin only when we used the mutant r-protein gene as a  
238 starting material (**Extended Data Fig. 8b**). In addition, a previous study showed that  
239 most r-proteins do not exchange between ribosomes<sup>44</sup>. Taken together, we concluded  
240 that the nascent artificial ribosomes consisted of nascent rRNAs and r-proteins.

241 Finally, we investigated whether LSU and SSU could be reconstituted in a single  
242 reaction. We coactivated the transcription of an artificial rRNA operon with orl-oASD,  
243 SpcR in the 16S rRNA, and CldR in the 23S rRNA, and the production of 54 r-proteins  
244 in the optimized S150 cell extract (**Extended Data Fig. 9a**), leading to the successful  
245 reconstitution of both LSU and SSU biogenesis in a single reaction space (**Extended**  
246 **Data Fig. 9b**). Therefore, we finally succeeded in reconstituting the entire ribosome  
247 biogenesis process *in vitro*.

248

## 249 **Conclusions**

250 In this study, we achieved the reconstitution of the entire ribosome self-replication  
251 process outside a living cell, which has been one of the largest long-standing challenges  
252 in synthetic biology. The reconstituted *in vitro* ribosome biogenesis would provide us  
253 with more freedom in controlling the process of ribosome biogenesis. Therefore, this  
254 achievement would pave the way to reveal fundamental principles underlying ribosome

255 biogenesis and to elucidate the mechanisms of ribosomopathies<sup>24</sup>. Furthermore, our  
256 achievement brings the bottom-up creation of self-replicating artificial cells within  
257 reach as life scientists now have successfully activated *in vitro* all the processes  
258 necessary for the autonomous central dogma, i.e., DNA replication<sup>45,46</sup>, transcription<sup>47</sup>,  
259 translation<sup>48,49</sup>, and in this study, ribosome biogenesis. Finally, the nature of our  
260 platform (autonomous ribosome assembly *in vitro* from DNA and the lack of cell  
261 viability constraints) opens new opportunities for the high-throughput and  
262 unconstrained creation of artificial ribosomes with altered or enhanced properties<sup>8-12</sup>,  
263 significantly expanding types of polymers available to humankind.

264

265 **Figures and figure legends**

Figure 1

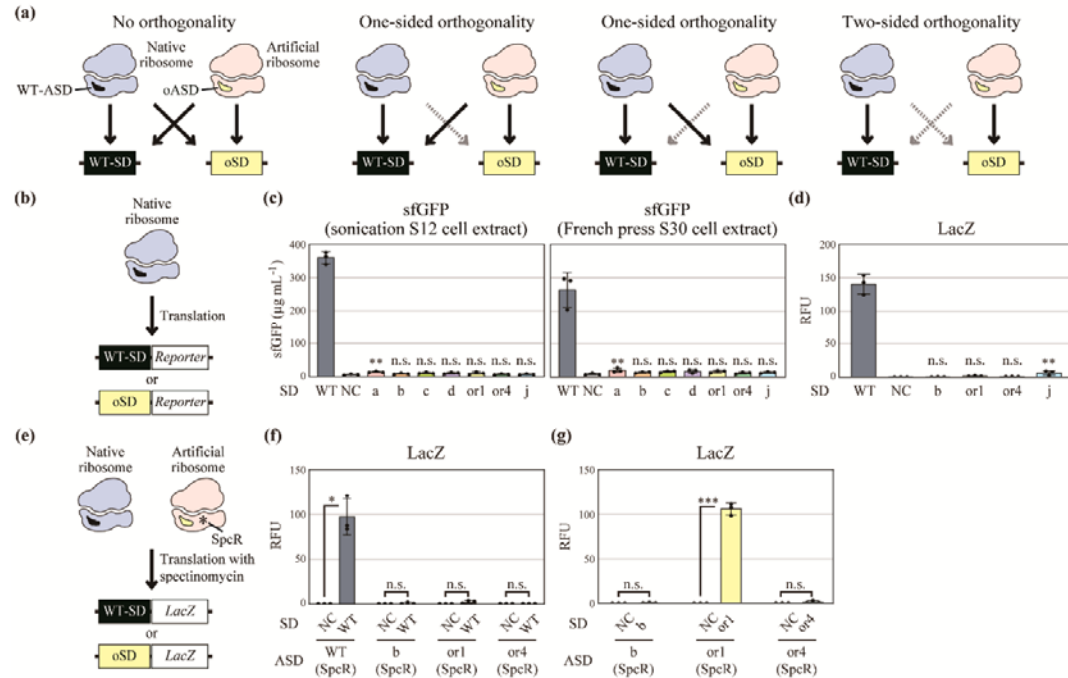

266 **Fig. 1. Screening orthogonal oSD-oASD pairs with two-sided orthogonality *in vitro*.**

267 (a) Four types of orthogonality. Black and gray arrows indicate functional and  
 268 nonfunctional interactions, respectively. SD, Shine–Dalgarno sequence; ASD,  
 269 anti-Shine–Dalgarno sequence; oSD, orthogonal SD; oASD, orthogonal ASD. (b)  
 270 Experimental scheme to screen oSDs that do not interact with native ribosomes in cell  
 271 extracts. (c) oSD selection. Either a WT-SD–sfGFP or an oSD–sfGFP reporter (named a,  
 272 b, c, d, or1, or4, and j) was mixed with S12 or S30 cell extracts prepared using BL21  
 273 Star<sup>TM</sup> (DE3) *lacZ::kmr*. NC, negative control without a reporter. The data represent the  
 274 mean  $\pm$  SD ( $n = 3$ ). \*\*,  $p < 0.01$ ; n.s., not significant; Dunnett’s test against NC. (d)  
 275 Further oSD selection. Either a WT-SD–LacZ or an oSD–LacZ reporter (b, or1, or4,  
 276 and j) was mixed with S12 cell extracts. RFU, relative fluorescence unit; NC, negative  
 277 control without a reporter. The data represent the mean  $\pm$  SD ( $n = 3$ ). \*\*,  $p < 0.01$ ;

278 Dunnett's test against NC. **(e)** Experimental scheme to screen oSD·oASD pairs with  
279 two-sided orthogonality in cell extracts. Cell extracts were prepared using BL21 Star<sup>TM</sup>  
280 (DE3) *lacZ::frit* expressing an artificial rRNA operon with WT-ASD or oASD (b, or1,  
281 or or4) and C1192U spectinomycin resistance (SpcR). **(f)** Screening oASDs that do not  
282 interact with the WT-SD–LacZ reporter. The cell extracts were mixed with the  
283 WT-SD–LacZ reporter and spectinomycin. NC, negative control without the reporter.  
284 The data represent the mean  $\pm$  SD (n = 3). \*,  $p < 0.05$ ; Welch's *t*-test. **(g)** Screening  
285 oSD·oASD pairs with two-sided orthogonality. The cell extract was mixed with the  
286 cognate oSD–LacZ reporter and spectinomycin. NC, negative control without a reporter.  
287 The data represent the mean  $\pm$  SD (n = 3). \*\*\*,  $p < 0.001$ ; Welch's *t*-test.  
288

Figure 2

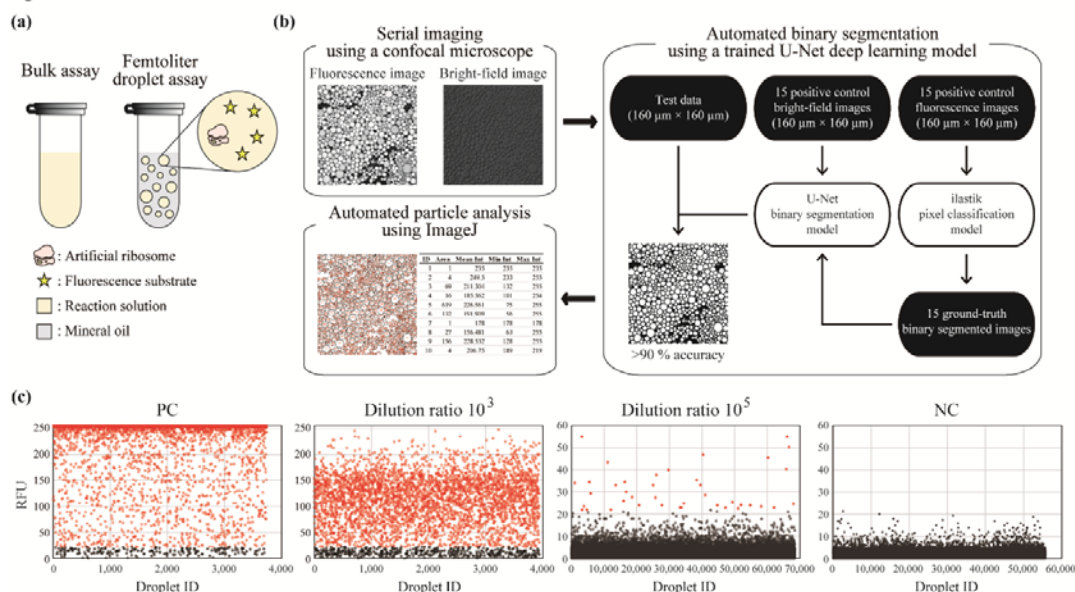

289 **Fig. 2. Highly sensitive detection of the artificial ribosome translational activity.**

290 (a) Comparison between a conventional bulk assay and a femtoliter droplet assay. (b)

291 Deep-learning-assisted automated femtoliter droplet assay. After cell-free transcription

292 and translation in femtoliter droplets, bright-field and fluorescence images of the

293 droplets are obtained using a confocal fluorescence microscope. The bright-field images

294 are binary segmented (droplet or background) using a trained U-Net deep-learning

295 model. The binary segmented images are obtained for particle analysis using ImageJ,

296 and the results are redirected to corresponding fluorescence images. Finally, we obtain

297 the features of each droplet including area and relative fluorescence unit (RFU). (c)

298 Highly sensitive detection of the artificial ribosome translational activity. We prepared

299 two types of S12 cell extracts; one contained native ribosomes and 4.9  $\mu\text{M}$  of artificial

300 ribosomes with or1-oASD and C1192U spectinomycin resistance (SpcR) and the other

301 only native ribosomes. The cell extract containing the artificial ribosomes was diluted

302 by the control cell extract at the indicated ratio. The cell-free transcription and

303 translation in femtoliter droplets were carried out in the presence of the or1-oSD-LacZ

304 reporter and 100  $\mu$ M of spectinomycin. In the scatter plots, the vertical and the  
305 horizontal axes indicate the mean RFU and the ID of each droplet, respectively.  
306 Droplets over the threshold (the mean RFU  $\geq$  22) are indicated in red. PC, positive  
307 control without dilution; NC, negative control using only the control cell extract.  
308



Figure 3

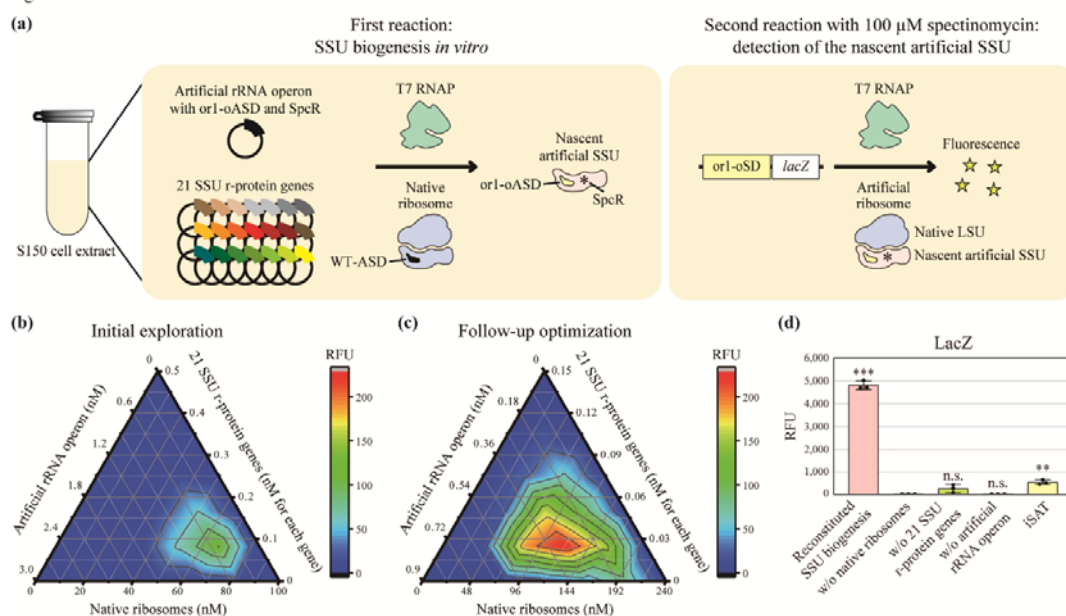

309 **Fig. 3. Reconstitution of SSU biogenesis *in vitro*.**

310 (a) Experimental scheme to reconstitute SSU biogenesis *in vitro*. (b) Exploring optimal  
 311 conditions for the first reaction using a simplex-lattice design. The concentrations of the  
 312 native ribosomes, the artificial rRNA operon with or1-oASD and C1192U  
 313 spectinomycin resistance (SpcR), and 21 SSU r-protein genes were 0–100, 0–3, and  
 314 0–0.5 nM each, respectively. RFU, mean relative fluorescence unit of the fluorescent  
 315 droplets. (c) Follow-up optimization of the first reaction. The concentrations of the  
 316 native ribosomes, the artificial rRNA operon, and 21 SSU r-protein genes were 0–240,  
 317 0–0.9, and 0–0.15 nM each, respectively. (d) Successful detection of the nascent  
 318 artificial SSU translational activity using the bulk assay under the optimized reaction  
 319 condition. The concentrations of the native ribosomes, the artificial rRNA operon, and  
 320 21 SSU r-protein genes were 80, 0.3, and 0.05 nM each, respectively. RFU, relative  
 321 fluorescence unit. The data represent the mean  $\pm$  SD ( $n = 3$ ). \*\*\*,  $p < 0.001$ ;

322 \*\*,  $p < 0.01$ ; n.s., not significant; Dunnett's test against the negative control without

323 native ribosomes.

324

Figure 4

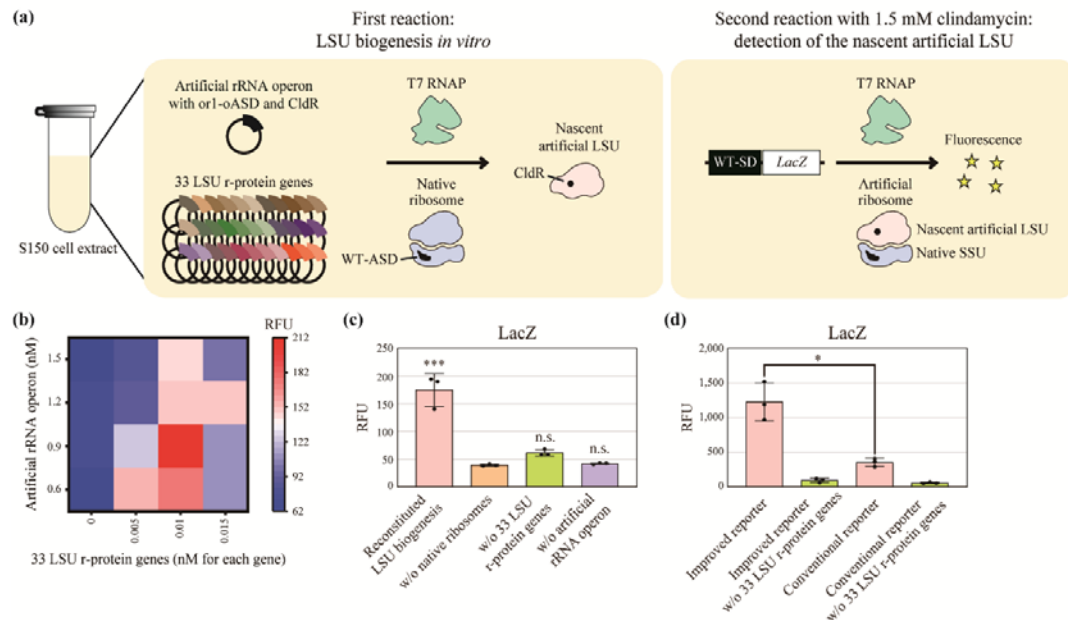

325 **Fig. 4. Reconstitution of LSU biogenesis *in vitro*.**

326 **(a)** Experimental scheme to reconstitute LSU biogenesis *in vitro*. **(b)** Exploring optimal  
 327 conditions for the first reaction using the bulk assay. The concentrations of the native  
 328 ribosomes, artificial rRNA operon with A2058U clindamycin resistance (CldR), and  
 329 33 LSU r-protein genes were 80, 0.6–1.5, and 0–0.015 nM each, respectively. RFU,  
 330 relative fluorescence unit. **(c)** Reproducible detection of the nascent artificial LSU  
 331 translational activity under the optimized reaction condition. The concentrations of the  
 332 native ribosomes, the artificial rRNA operon, and 33 LSU r-protein genes were 80, 0.9,  
 333 and 0.01 nM each, respectively. The data represent the mean  $\pm$  SD ( $n = 3$ ).  
 334 \*\*\*,  $p < 0.001$ ; n.s., not significant; Dunnett's test against the negative control without  
 335 native ribosomes. **(d)** Improvement of the nascent LSU-derived fluorescence signal  
 336 using an improved LacZ reporter with a modified 5'UTR sequence. The data represent  
 337 the mean  $\pm$  SD ( $n = 3$ ). \*,  $p < 0.05$ ; Welch's  $t$ -test.

338

339 **Extended data figures/tables**

Extended Data Fig. 1

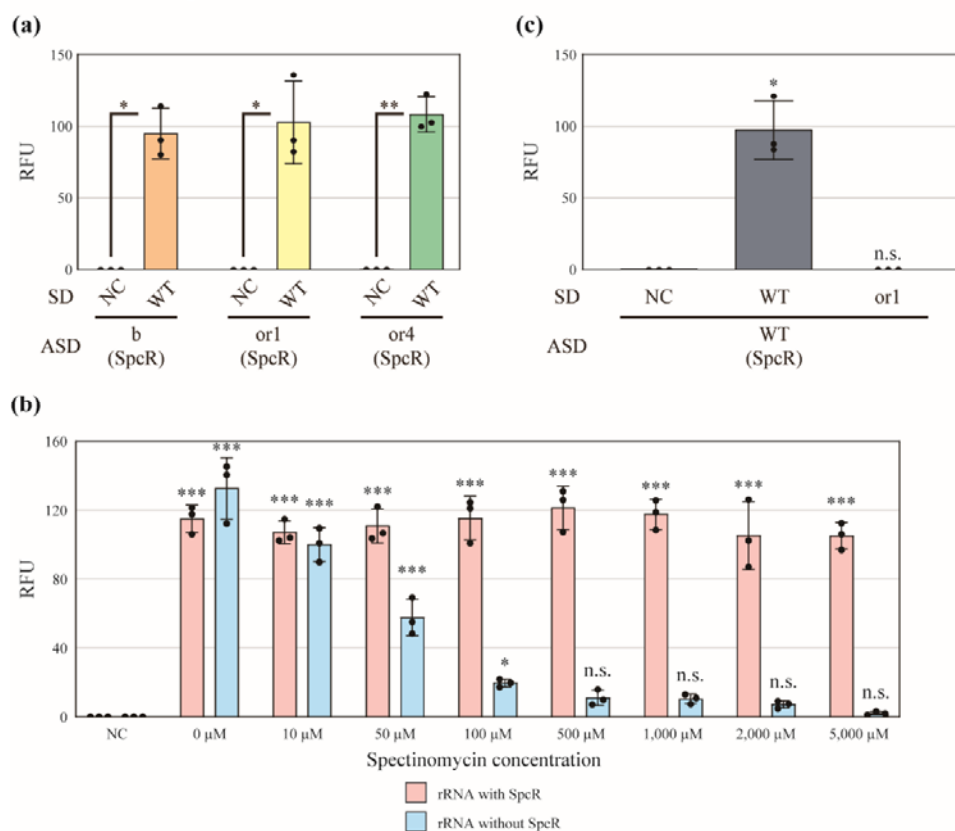

340 **Extended Data Fig. 1. Supporting experiments for screening oSD-oASD pairs with**  
 341 **two-sided orthogonality.**

342 (a) Functional cell extract preparation. S12 Cell extracts were prepared using *E. coli*  
 343 expressing an artificial rRNA operon with oASD (b, or1, or or4) and C1192U  
 344 spectinomycin resistance (SpcR). The cell extracts were mixed with a WT-SD-LacZ  
 345 reporter. The cell extracts that generated strong fluorescence signals were considered  
 346 functional. RFU, relative fluorescence unit; NC, negative control without the reporter.  
 347 The data represent the mean  $\pm$  SD (n = 3). \*,  $p < 0.05$ ; \*\*,  $p < 0.01$ ; Welch's *t*-test. (b)  
 348 Optimizing spectinomycin concentrations. S12 cell extracts were prepared using BL21  
 349 Star<sup>TM</sup> (DE3) *lacZ::frr* expressing an rRNA operon with WT-ASD and/or SpcR. The

350 cell extracts were mixed with the WT-SD-LacZ reporter at various spectinomycin  
351 concentrations. We concluded that 5 mM spectinomycin completely inactivated native  
352 ribosomes but left the artificial ribosomes with SpcR unaffected. We used  
353 spectinomycin at 5 mM in the following experiments if not specified. NC, negative  
354 control without the reporter. The data represent the mean  $\pm$  SD (n = 3). \*,  $p < 0.05$ ;  
355 \*\*\*,  $p < 0.001$ ; n.s., not significant; Dunnett's test against NC. (c) A follow-up control  
356 experiment to verify two-sided orthogonality of the or1-oSD-oASD pair. A cell extract  
357 was prepared using *E. coli* expressing an artificial rRNA operon with WT-ASD and  
358 SpcR. The extract was mixed with the WT-SD-LacZ or the or1-oSD-LacZ reporter in  
359 the presence of spectinomycin. The cell extract generated no fluorescence signal when  
360 mixed with the or1-oSD-LacZ reporter, indicating that SpcR did not contribute to the  
361 fluorescence signal observed in **Fig. 1g**. NC, negative control without a reporter. The  
362 data represent the mean  $\pm$  SD (n = 3). \*,  $p < 0.05$ ; n.s., not significant; Dunnett's test  
363 against NC.  
364

Extended Data Fig. 2

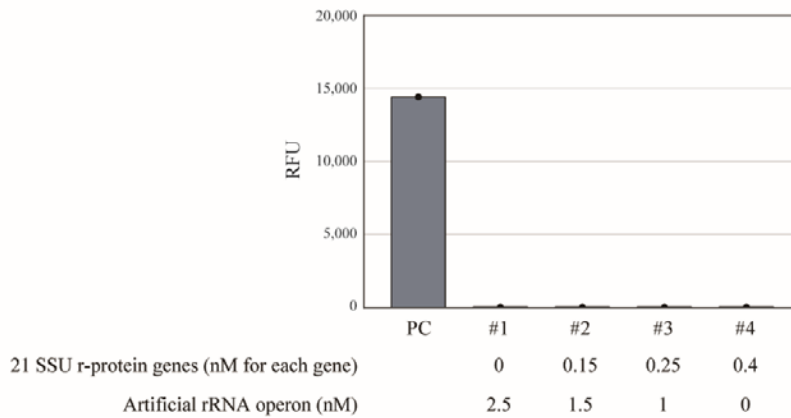

365 **Extended Data Fig. 2. An initial trial to reconstitute SSU biogenesis.**

366 Experimental scheme to reconstitute SSU biogenesis *in vitro* is shown in **Fig. 3a**.  
367 Briefly, the first reaction is designed for coactivating the transcription of the artificial  
368 rRNA operon with or1-oASD and SpcR, the transcription and translation of 21 SSU  
369 r-protein genes, and coordinated assembly in an optimized S150 cell extract, containing  
370 the ~100 accessory factors for ribosome biogenesis and imitating cytoplasmic chemical  
371 conditions. The second reaction aimed at detecting the translational activity of nascent  
372 artificial SSU using the or1-oSD–LacZ reporter. Exploring several reaction conditions  
373 did not generate any fluorescence signals derived from nascent SSU. The concentrations  
374 of the native ribosomes, the artificial rRNA operon with or1-oASD and C1192U  
375 spectinomycin resistance (SpcR), and 21 SSU r-protein genes were 20, 0–2.5, and  
376 0–0.4 nM each, respectively. RFU, relative fluorescence unit; PC, positive control using  
377 native ribosomes and the WT-SD–LacZ reporter.

378

379

Extended Data Fig. 3

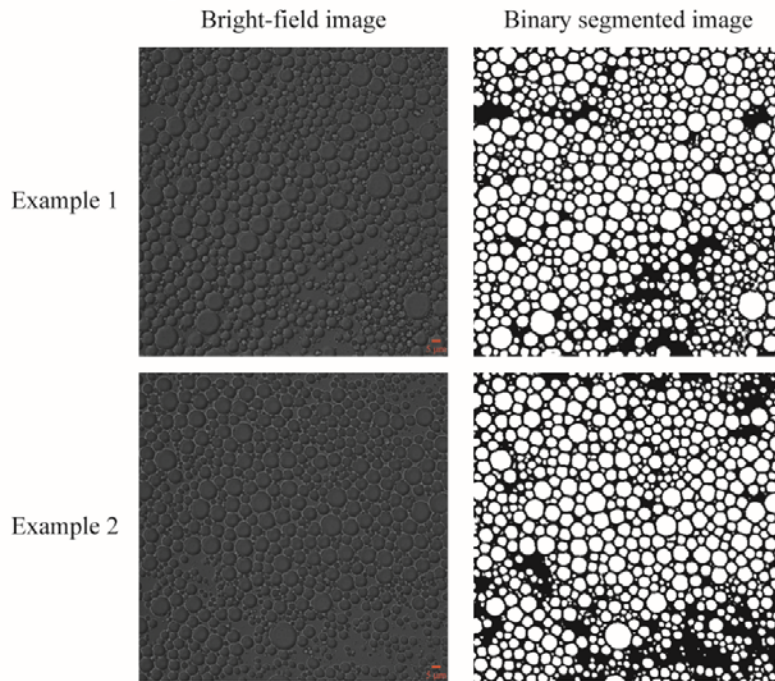

380 **Extended Data Fig. 3. Binary segmentation by the trained U-Net deep-learning**  
381 **model.**

382 Bright-field images of the droplets (left panels) were processed into binary segmented  
383 images (right panels; droplet or background) with >90 % accuracy (number of correctly  
384 classified pixels/total number of pixels) using the trained U-Net deep-learning model. In  
385 the right panels, white and black regions indicate the droplets and background,  
386 respectively. Scale bars = 5  $\mu\text{m}$ .

387

Extended Data Fig. 4

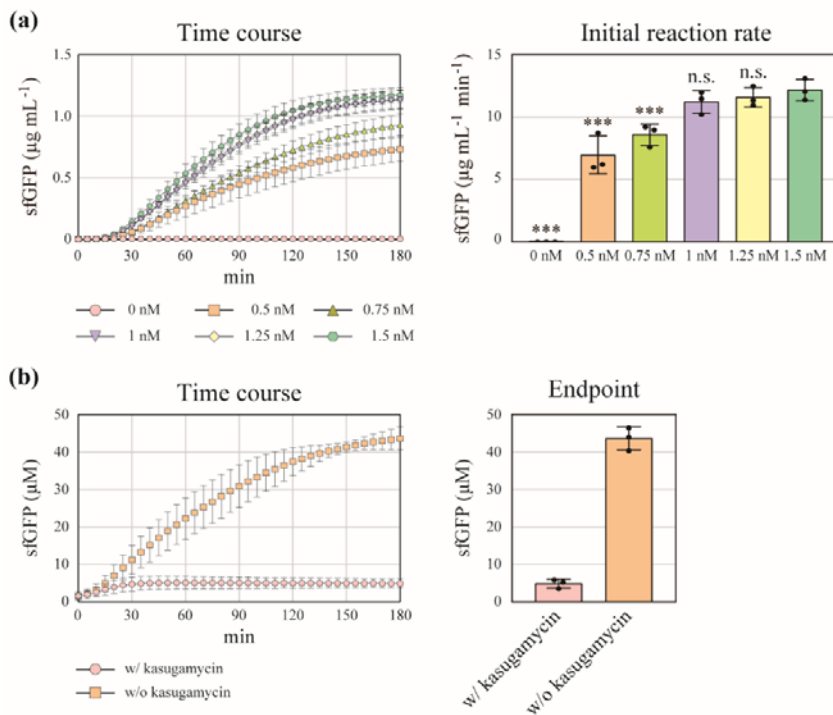

388 **Extended Data Fig. 4. Estimation of the artificial ribosome concentration with**  
389 **or1-oASD and C1192U spectinomycin resistance (SpcR).**

390 **(a)** Determining non-rate-limiting concentrations of the or1-oSD-sfGFP reporter. The  
391 S12 cell extract was prepared using BL21 Star<sup>TM</sup> (DE3) *lacZ::frr* expressing the  
392 artificial rRNA operon with or1-oASD and SpcR. The cell extract was mixed with  
393 spectinomycin and 0–1.5 nM of the or1-SD-sfGFP reporter. We found that transcription  
394 was not rate-limiting when reporter concentrations were over 1 nM. The data represent  
395 the mean  $\pm$  SD ( $n = 3$ ). \*\*\*,  $p < 0.001$ ; n.s., not significant; Dunnett's test against  
396 1.5 nM. **(b)** Quantification of the number of the artificial ribosomes with or1-oASD and  
397 SpcR. The cell extract was mixed with spectinomycin and 1 nM of the or1-oSD-sfGFP  
398 reporter. In the presence of kasugamycin, the concentration of produced sfGFP equals  
399 that of the artificial ribosomes. The estimated concentration of the artificial ribosomes  
400 was 4.9  $\mu\text{M}$ . The data represent the mean  $\pm$  SD ( $n = 3$ ).



Extended Data Fig. 5

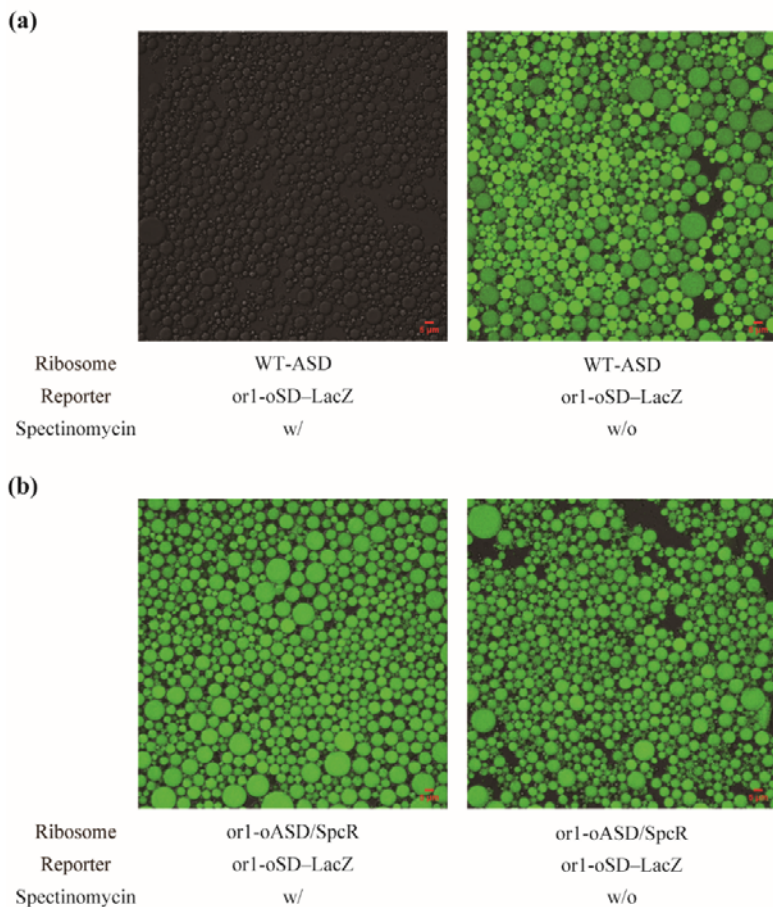

401 **Extended Data Fig. 5. Native ribosome deactivation by spectinomycin in the**  
402 **femtoliter droplet assay.**

403 **(a)** Representative micrographs of droplets after the femtoliter droplet assay using  
404 control S12 cell extracts containing only native ribosomes. The concentration of the  
405 or1-oSD-LacZ reporter was 5 nM. The droplets emitted strong fluorescence without  
406 spectinomycin as the femtoliter droplet assay is so sensitive that a very weak interaction  
407 between the native ribosomes and the or1-oSD-LacZ reporter could be detected. The  
408 addition of 100  $\mu$ M spectinomycin eliminated this nonspecific fluorescence signal.  
409 Scale bars = 5  $\mu$ m. **(b)** Representative micrographs of droplets after the femtoliter  
410 droplet assay using S12 cell extracts containing artificial ribosomes with or1-oASD and

411 C1192U spectinomycin resistance (SpcR). The concentration of the or1-oSD-LacZ  
412 reporter was 5 nM. The droplets emitted strong fluorescence with or without 100  $\mu$ M  
413 spectinomycin. Scale bars = 5  $\mu$ m.  
414

Extended Data Fig. 6

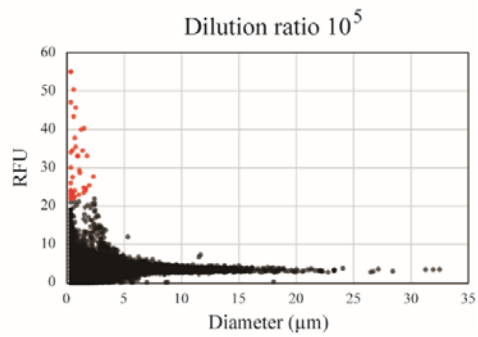

415 **Extended Data Fig. 6. Single-ribosome-level detection of the artificial ribosome**

416 **translational activity.**

417 Scatter plot of the mean relative fluorescence unit (RFU) against the diameter of each

418 droplet was generated using the dataset of **Fig. 2c**. Droplets over the threshold (the

419 mean RFU  $\geq 22$ ) are shown in red. From the Poisson distribution formula, most of the

420 fluorescent droplets (89 %) were estimated to contain only one artificial ribosome.

421

Extended Data Fig. 7

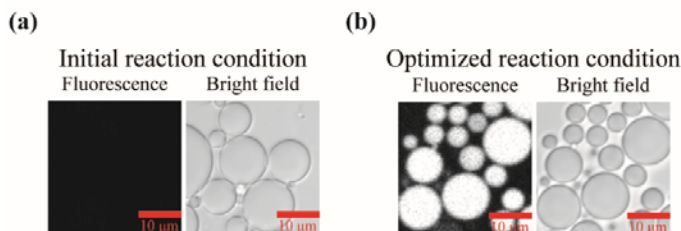

422 **Extended Data Fig. 7. Representative images of the femtoliter droplet assay.**

423 (a) A representative micrograph of droplets in the initial trial. In the first reaction, the  
424 concentrations of the native ribosomes, the artificial rRNA operon with or1-oASD and  
425 C1192U spectinomycin resistance (SpcR), and 21 SSU r-protein genes were 20, 1, and  
426 0.25 nM each, respectively. Scale bars = 10  $\mu$ m. (b) A representative micrograph of  
427 droplets in the optimized reaction condition. The concentrations of the native ribosomes,  
428 the artificial rRNA operon, and 21 SSU r-protein genes were 80, 0.3, and 0.05 nM each,  
429 respectively. Scale bars = 10  $\mu$ m.

430

Extended Data Fig. 8

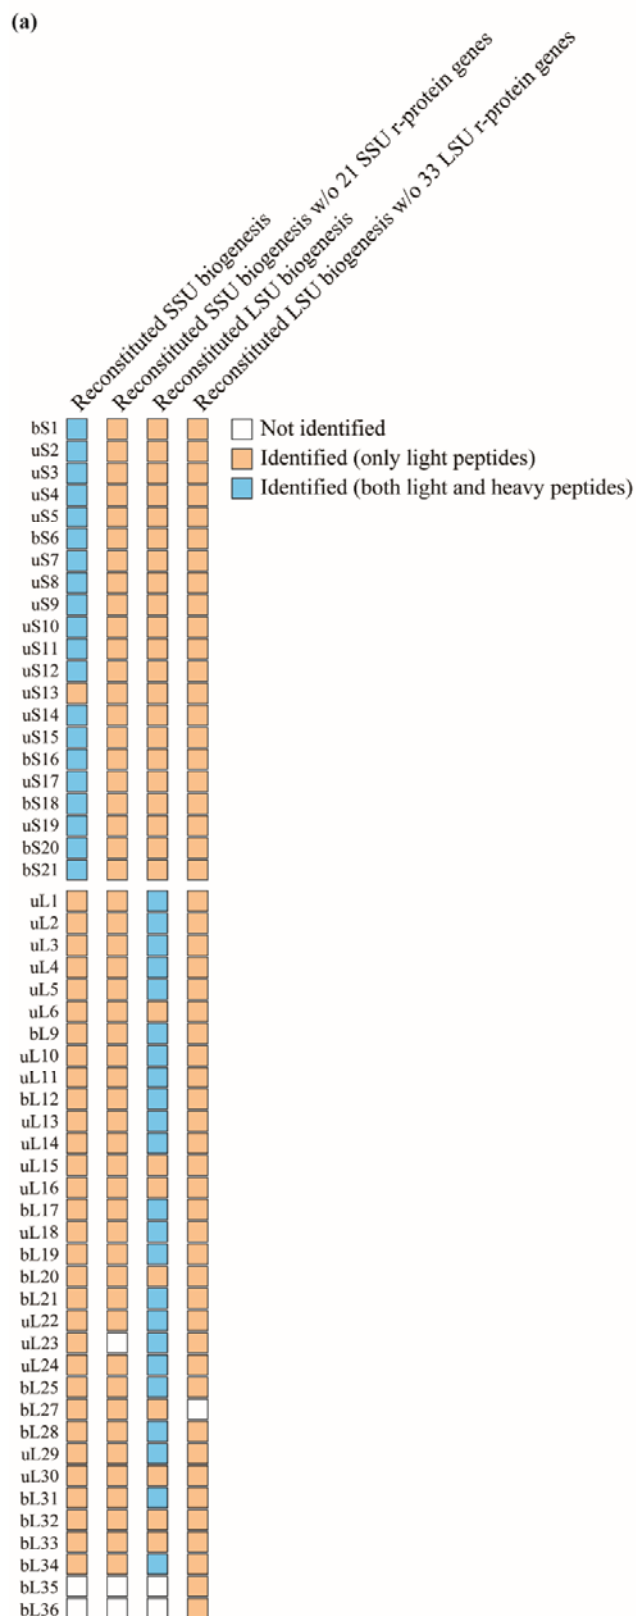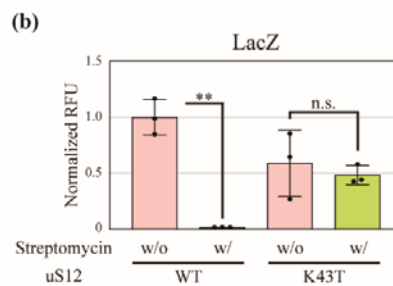

432 **Extended Data Fig. 8. Supporting pieces of evidence for the *in vitro* SSU and LSU**  
433 **biogenesis.**

434 **(a)** Detection of pre-existing and nascent r-proteins. We replaced unlabeled (light)  
435 L-arginine and L-lysine with stable isotope-labeled (heavy) L-arginine ( $^{13}\text{C}_6$ ,  $^{15}\text{N}_4$ ) and  
436 L-lysine ( $^{13}\text{C}_6$ ,  $^{15}\text{N}_2$ ) to label nascent r-proteins in the reaction solutions during the  
437 reconstituted SSU or LSU biogenesis (**Fig. 3 and 4**). As negative controls, we omitted  
438 the r-protein genes from the reaction solutions. Certain r-proteins were not identified  
439 (e.g., bL35 and bL36 in the reconstituted SSU biogenesis) because r-proteins are very  
440 small and difficult targets for proteomics. The heavy peptides of certain r-proteins were  
441 not identified (e.g., uS13 in the reconstituted SSU biogenesis); the absence of heavy  
442 peptides does not mean the absence of nascent proteins because of the stochastic nature  
443 of the protein identification algorithm. **(b)** Direct evidence for the incorporation of  
444 newly synthesized r-proteins into nascent ribosomes. The concentrations of the native  
445 ribosomes, the artificial rRNA operon with or1-oASD and C1192U spectinomycin  
446 resistance (SpcR), and 21 SSU r-protein genes were 80, 0.3, and 0.05 nM each,  
447 respectively. A mutant r-protein gene encoding uS12 K43T was used instead of an  
448 r-protein gene encoding native uS12. The uS12 K43T mutation confers streptomycin  
449 resistance to SSU. The translational activity of the nascent artificial SSU was detected  
450 using the or1-oSD–LacZ reporter in the presence of spectinomycin and streptomycin.  
451 NC, negative control without 21 SSU r-protein genes. The data represent the normalized  
452 relative fluorescence unit (RFU) in the bulk assay and are shown as the mean  $\pm$  SD  
453 (n = 3). \*\*,  $p < 0.01$ ; Welch's  $t$ -test.

454

Extended Data Fig. 9

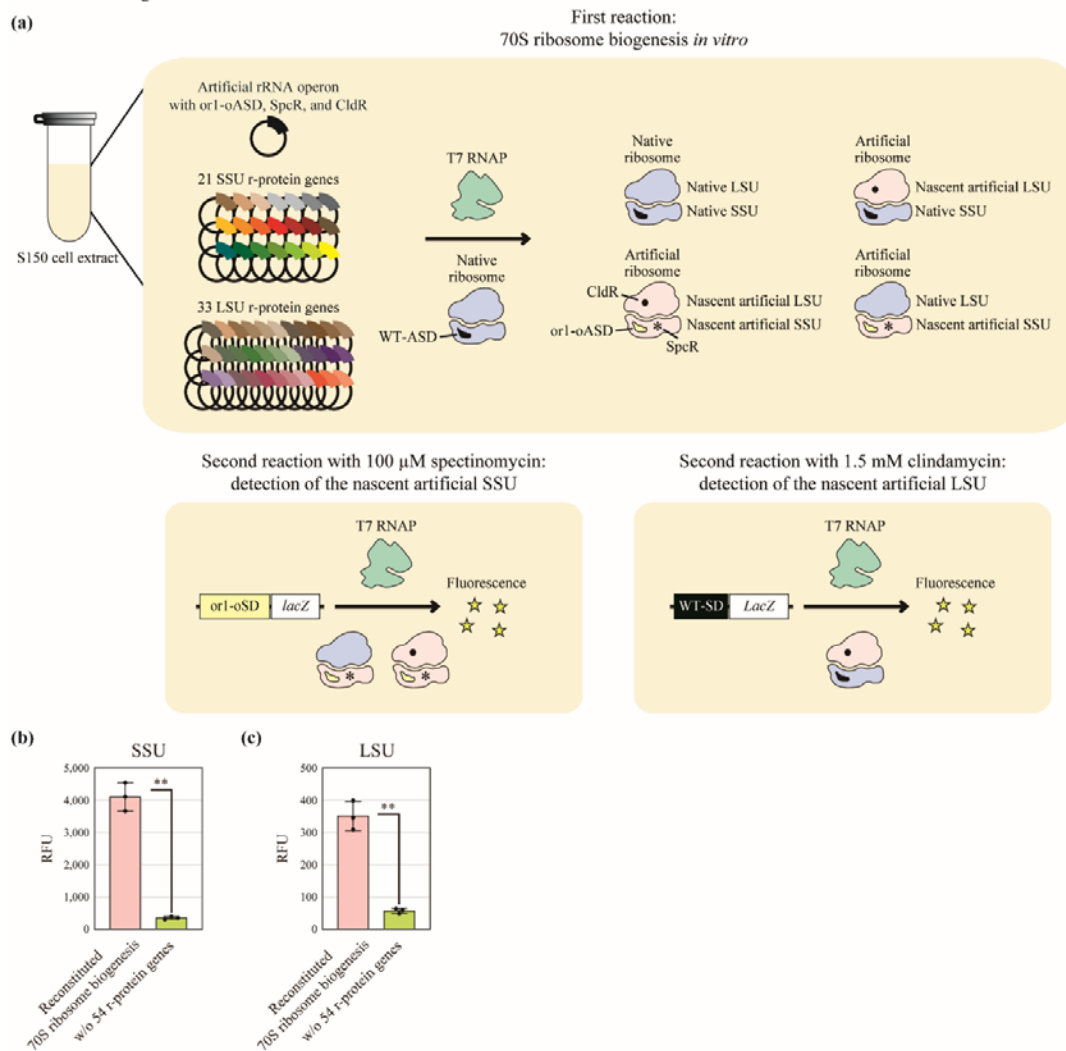

455 **Extended Data Fig. 9. *In vitro* reconstitution of the entire ribosome biogenesis**  
 456 **process in a single reaction.**

457 (a) Experimental scheme to reconstitute both SSU and LSU biogenesis *in vitro* in a  
 458 single reaction. (b and c) Successful detection of the nascent artificial SSU and LSU  
 459 translational activity using the bulk assay under the optimized reaction condition. The  
 460 concentrations of the native ribosomes, artificial rRNA operon with or1-oASD, C1192U  
 461 spectinomycin resistance (SpcR), and A2058U clindamycin resistance (CldR), and 54

462 r-protein genes were 80, 0.9, and 0.01 nM each, respectively. The data represent the  
463 mean  $\pm$  SD (n = 3). \*\*,  $p < 0.01$ ; Welch's *t*-test.

464



## 465 **Methods**

### 466 **Strains and plasmids**

467 The chromosomal *lacZ* gene of the BL21 Star<sup>TM</sup> (DE3) (Thermo Fisher Scientific,  
468 Waltham, MA, USA) was disrupted by Red-mediated recombination<sup>50</sup>. Briefly, pKD46  
469 encoding phage  $\lambda$ -Red recombinase was transformed into the *E. coli* cells. The  
470 transformants were grown in 50 mL of SOC medium with 100  $\mu$ g/ml ampicillin  
471 (Viccillin<sup>®</sup> for injection, Meiji Seika Pharma, Tokyo, Japan) and 10 mM  
472 L-(+)-arabinose (Nacalai Tesque, Kyoto, Japan). The fragment of the  
473 kanamycin-resistance gene (*kmr*) was amplified using primers (H1P1 forward primer,  
474 5'-  
475 GAAATTGTGAGCGGATAACAATTTACACAGGAAACAGCTGTGTAGGCTGG  
476 AGCTGCTTC-3', and P4H2 reverse primer,  
477 5'-TTACGCGAAATACGGGCAGACATGGCCTGCCCGGTTATTAATTCCGGGGA  
478 TCCGTCGACC-3') from pKD13, and introduced into the *E. coli* cells by  
479 electroporation. The electroporated cells were grown on an LB agar plate with 50  $\mu$ g/ml  
480 of kanamycin monosulfate (Nacalai Tesque) to select Km<sup>R</sup> transformants. The resulting  
481 strain is described as BL21 Star<sup>TM</sup> (DE3) *lacZ::kmr*. The FLP helper plasmid, pCP20,  
482 was transformed into the BL21 Star<sup>TM</sup> (DE3) *lacZ::kmr* to eliminate the *kmr* gene. As  
483 pCP20 harbors a temperature-sensitive replicon and shows thermal induction of FLP  
484 synthesis, the transformants were cultured nonselectively at 37 °C and tested for the loss  
485 of antibiotic resistance. The resulting strain is described as BL21 Star<sup>TM</sup> (DE3)  
486 *lacZ::frit*.

487 The *rrnB* rRNA operon was inserted into pET-41a(+). Genes encoding 54  
488 r-proteins were cloned from the *E. coli* DH5 $\alpha$  genome. In this study, we included bS1 in

489 r-proteins, which works more as a translational factor than a structural component,  
490 because additional bS1 could improve protein yields<sup>51-54</sup>. The expression of the genes  
491 encoding 54 r-proteins was regulated by the *pT7CONS*<sup>55</sup> and *EpsA20*<sup>56</sup> sequences,  
492 improving transcription and translation efficiencies. *pT7CONS* and *EpsA20* were also  
493 used to construct an improved LacZ reporter. Mutations in genes encoding rRNAs and  
494 r-proteins were introduced by mutagenic primer-based PCR.

495         The strains and plasmids used in this study are listed in **Supplementary**  
496 **Information 2**.

497

#### 498 **Sonicated S12 cell extract preparation**

499 Sonicated S12 cell extracts were prepared as previously described with some  
500 modifications<sup>57</sup>. Briefly, *E. coli* cells were grown in 200 mL of 2 × YPTG medium at  
501 37 °C and pelleted by centrifugation. The cell pellets were resuspended in buffer A. The  
502 suspended cells were disrupted by a Q125 Sonicator (Qsonica, Newtown, CT, USA) at  
503 a frequency input of 20 kHz and amplitude of 50 %. The sonication energy input was  
504 500 J for 1 mL cell suspension. The cell extract was centrifuged at 4 °C and 12,000 g  
505 for 10 min, and the supernatant was collected. The obtained cell extract was  
506 flash-frozen in liquid nitrogen and preserved at -80 °C until further use.

507

#### 508 **French press cell extract preparation**

509 French press S30 cell extracts were prepared based on previous reports with some  
510 modifications<sup>4,5,58</sup>. Briefly, *E. coli* cells were grown in 1 L of 2 × YPTG medium at  
511 37 °C and pelleted by centrifugation. The cell pellets were resuspended in buffer A  
512 (20 mM Tris-HCl, 100 mM NH<sub>4</sub>Cl, 10 mM MgCl<sub>2</sub>, 0.5 mM EDTA, and 2 mM DTT,

513 pH = 7.2). Halt Protease Inhibitor Cocktail (Thermo Fisher Scientific) and RNase  
514 Inhibitor (QIAGEN) were added to the suspension. The cells were disrupted using an  
515 EmulsiFlex-C5 homogenizer (Avestin, Ottawa, Canada) with a single pass at a pressure  
516 of 20,000 psi. RNase Inhibitor and DTT were added to the cell extracts followed by  
517 centrifugation at 4 °C, 30,000 g for 30 min twice. The collected supernatant was  
518 dialyzed four times against the iSAT buffer (50 mM HEPES-KOH, 10 mM magnesium  
519 glutamate, 200 mM potassium glutamate, 2 mM DTT, 1 mM spermidine, and 1 mM  
520 putrescine), imitating cytoplasmic chemical conditions<sup>58</sup>. For clarification and  
521 concentration, the cell extract was centrifuged at 4,000 g for 10 min in a Centriprep<sup>®</sup> 3K  
522 device (EMD Millipore, Burlington, MA, USA). The obtained cell extract was  
523 flash-frozen in liquid nitrogen and preserved at -80 °C until further use.

524 French press S150 cell extracts were prepared as previously described with some  
525 modifications<sup>4,5</sup>. Briefly, BL21 Star<sup>™</sup> (DE3) *lacZ::frit* harboring pT7\_WT-ASD\_rRNA  
526 was grown in 1 L of 2 × YPTG medium with 50 µg/mL of kanamycin at 37 °C until the  
527 OD<sub>600</sub> reached 0.5. The cells were incubated with 0.1 mM  
528 isopropyl-β-D-thiogalactopyranoside (IPTG, Nacalai Tesque). Then, the cells were  
529 disrupted using an EmulsiFlex-C5 homogenizer (Avestin) with a single pass at a  
530 pressure of 20,000 psi. The cell extracts were centrifuged at 30,000 g for 30 min at 4 °C.  
531 The collected supernatants were centrifuged at 90,000 g for 21 h at 4 °C. The collected  
532 supernatants were further centrifuged at 150,000 g for 3 h at 4 °C. Then, the collected  
533 supernatants were dialyzed using the iSAT buffer. The cell extracts were concentrated  
534 using Amicon Ultra-15 3 kDa cutoff (Merck Millipore, Burlington, MA, USA). The  
535 obtained cell extract was flash-frozen in liquid nitrogen and preserved at -80 °C until  
536 further use.

537

538 **Cell extract preparation containing ribosomes with artificial rRNAs**

539 A plasmid encoding an artificial rRNA operon was introduced into the BL21 Star<sup>TM</sup>  
540 (DE3) *lacZ::frit*. The transformant was grown in a 2 × YPTG medium with 50 µg/mL of  
541 kanamycin at 37 °C until the OD<sub>600</sub> reached 0.7. The cultured cells were incubated with  
542 0.1 mM IPTG (Nacalai Tesque) for 3 h. The cell extracts were prepared as described  
543 above.

544

545 **Cell-free transcription and translation (CF-TXTL)**

546 CF-TXTL was performed according to a previous report with modifications<sup>4</sup>. *E. coli*  
547 ribosomes were purchased from New England BioLabs (Ipswich, MA, USA). T7 RNA  
548 polymerase (T7 RNAP, New England BioLabs) was added to a final concentration of  
549 0.8 U/µL. T7 RNAP was not added when we used cell extracts derived from  
550 IPTG-induced BL21 Star<sup>TM</sup> (DE3) or its derivative strains. The reporter plasmid  
551 concentration was 1.5 nM. The sfGFP or LacZ reporter expression was induced by  
552 IPTG at a final concentration of 2 mM. We used 5-chloromethylfluorescein  
553 di-β-D-galactopyranoside (CMFDG; Invitrogen, Waltham, MA, USA) as a substrate of  
554 LacZ at a final concentration of 33 µM. CF-TXTL was conducted using 15 µL reaction  
555 solutions at 37 °C in a 96-well plate (polystyrene, solid bottom, half area, black-walled,  
556 Greiner Bio-One International GmbH, Kremsmünster, Austria). The reporter signals  
557 were quantified using fluorescence microplate readers, Fluoroskan Ascent FL<sup>TM</sup>  
558 (Thermo Fisher Scientific) or Infinite<sup>®</sup> 200 PRO (TECAN, Männedorf, Switzerland), at  
559  $\lambda_{\text{ex}} = 485 \text{ nm}$  and  $\lambda_{\text{em}} = 535 \text{ nm}$ . For native ribosome deactivation, spectinomycin  
560 (FUJIFILM Wako Pure Chemical Corporation, Osaka, Japan), streptomycin (FUJIFILM

561 Wako Pure Chemical Corporation), or clindamycin (Abcam, Cambridge, UK) were  
562 used at final concentrations of 5 mM, 10  $\mu\text{g}/\text{mL}$ , or 1.5 mM, respectively. For the  
563 ribosome concentration quantification, kasugamycin (FUJIFILM Wako Pure Chemical  
564 Corporation) was added to 2 mM 15 min after the beginning of CF-TXTL as previously  
565 reported<sup>59</sup>. The fluorescence intensity was kinetically measured after adding  
566 kasugamycin, and the background fluorescence intensity was subtracted. Kasugamycin  
567 is an antibiotic originally isolated from *Streptomyces kasugaensis* that blocks translation  
568 initiation by preventing the ribosomal subunit association. However, it did not affect  
569 translating or stalled 70S ribosomes<sup>60,61</sup>. The constituents of the CF-TXTL reaction  
570 solutions used in this study are summarized in **Supplementary Information 3**.

571 The *in vitro* reconstitution of SSU biogenesis was performed as follows. In the  
572 first reaction, the CF-TXTL solutions based on the S150 cell extracts were mixed with  
573 the native ribosomes, the artificial rRNA operon with or1-oASD and C1192U SpcR,  
574 and 21 SSU r-protein genes. We used S150 cell extracts to enable native ribosome  
575 concentration control. The solutions were incubated at 37 °C for 180 min. The reaction  
576 conditions were optimized using a simple lattice design (**Supplementary Information**  
577 **4**). In the second reaction, the resulting CF-TXTL solutions were mixed with  
578 pT7\_or1-oSD\_LacZ, CMFDG, 100  $\mu\text{M}$  spectinomycin, and an additional 15  $\mu\text{L}$  of the  
579 CF-TXTL solutions based on the S150 cell extracts. The fluorescence of the reaction  
580 solutions was measured by a bulk assay or a femtoliter droplet assay. In the bulk assay,  
581 the reporter signals were kinetically measured at 37 °C using Infinite<sup>®</sup> 200 PRO  
582 (TECAN) at  $\lambda_{\text{ex}} = 485 \text{ nm}$  and  $\lambda_{\text{em}} = 535 \text{ nm}$ . The femtoliter droplet assay was carried  
583 out as described below.

584           The *in vitro* reconstitution of LSU biogenesis was performed as follows. In the  
585 first reaction, the CF-TXTL solutions based on the S150 cell extracts were mixed with  
586 the native ribosomes, the artificial rRNA operon with or1-oASD, SpcR, and A2058U  
587 CldR, and 33 LSU r-protein genes. The solutions were incubated at 37 °C for 180 min.  
588 The reaction conditions were optimized by varying the concentrations of the artificial  
589 rRNA operon and 33 LSU r-protein genes (**Supplementary Information 4**). In the  
590 second reaction, the resulting CF-TXTL solutions were mixed with pT7\_WT-SD\_LacZ  
591 or pT7PCONS\_EpsA20\_WT-SD\_lacZ, CMFDG, clindamycin, and an additional 15 µL  
592 of the CF-TXTL solutions based on the S150 cell extracts. The fluorescence of the  
593 reaction solutions was kinetically measured at 37 °C using Infinite<sup>®</sup> 200 PRO (TECAN)  
594 at  $\lambda_{\text{ex}} = 485$  nm and  $\lambda_{\text{em}} = 535$  nm.

595           The *in vitro* reconstitution of the entire ribosome biogenesis process was  
596 conducted according to the protocol described above with minor modifications. In the  
597 first reaction, the concentrations of the native ribosomes, the artificial rRNA operon  
598 with or1-oASD, SpcR, and CldR, and 54 r-protein genes were 80, 0.9, and 0.01 nM  
599 each, respectively. In the second reaction, pT7\_or1-oSD\_LacZ and spectinomycin were  
600 used for the detection of the nascent artificial SSU, and  
601 pT7PCONS\_EpsA20\_WT-SD\_lacZ and clindamycin were used for the detection of the  
602 nascent artificial LSU. The reaction solution fluorescence was kinetically measured at  
603 37 °C using Infinite<sup>®</sup> 200 PRO (TECAN) at  $\lambda_{\text{ex}} = 485$  nm and  $\lambda_{\text{em}} = 535$  nm.

604           The iSAT assembly was performed according to previous reports<sup>4,5,58</sup> with some  
605 modifications. Briefly, in the first reaction, the CF-TXTL solutions based on the S150  
606 cell extracts were mixed with 100 nM total protein of 70S ribosome (TP70) and 0.3 nM  
607 of the artificial rRNA operon with or1-oASD and SpcR. The solutions were incubated at

608 37 °C for 180 min. In the second reaction, the resulting CF-TXTL solutions were mixed  
609 with pT7\_or1-oSD\_LacZ, CMFDG, spectinomycin, and an additional 15  $\mu$ L of the  
610 CF-TXTL solutions based on the S150 cell extracts. The reaction solution fluorescence  
611 was kinetically measured at 37 °C using Infinite<sup>®</sup> 200 PRO (TECAN) at  $\lambda_{\text{ex}} = 485$  nm  
612 and  $\lambda_{\text{em}} = 535$  nm.

613 The parameter values described above were tuned experiment-dependently and  
614 are specified in the figure legends.

615

### 616 **Femtoliter droplet assay**

617 An oil mixture was composed of light mineral oil (Sigma-Aldrich Corporation, St.  
618 Louis, MO, USA), 4.5 % sorbitan monooleate (Nacalai Tesque), and 0.5 % Triton<sup>®</sup>  
619 X-100 (Nacalai Tesque), as previously described<sup>62,63</sup>. The CF-TXTL reaction solutions  
620 were mixed with the oil mixture and tapped twenty times in microtubes (Maruemu  
621 Corporations, Osaka, Japan). The emulsions were incubated at 37 °C. The bright-field  
622 and fluorescence images of droplets were obtained using a confocal fluorescence  
623 microscope LSM700 (Carl Zeiss AG, Oberkochen, Germany). The 488 nm laser was  
624 focused using an oil immersion objective (Plan-Apochromat 40 $\times$ /1.4 Oil DIC M27, Carl  
625 Zeiss AG) with immersion oil (Immersionol<sup>™</sup> 518F, Carl Zeiss AG).

626

### 627 **Deep-learning-assisted automated femtoliter droplet assay**

628 It is a difficult task to extract features from a large number of droplets; hence, we  
629 devised a deep-learning-assisted automated analysis pipeline for a scalable and objective  
630 femtoliter droplet assay. We aimed to develop an analysis pipeline enabling area and  
631 centroid extraction of each droplet from the bright-field images and the fluorescence

632 intensity of each droplet from the corresponding fluorescence images. In the beginning,  
633 we produced positive control fluorescent droplets using purified LacZ (FUJIFILM  
634 Wako Pure Chemical Corporation) and CMFDG and generated 15 sets of bright-field  
635 and corresponding fluorescence images containing 27580 fluorescent droplets in total.  
636 We trained an ilastik<sup>64</sup> pixel classification model and processed the positive control  
637 fluorescence images into binary segmented images (droplet or background) as ground  
638 truth. We used a convolutional neural network architecture called U-Net<sup>39</sup> to build a  
639 binary segmentation model. We used the FastAI library<sup>65</sup> under an Anaconda virtual  
640 environment (Python 3.7, torch==1.4.0+cpu, torchvision==0.5.0+cpu). The model was  
641 trained using 13 sets of ground-truth binary segmented images and the corresponding  
642 bright-field images, and the remaining two sets of images were used as test data. We  
643 specified an encoder network, Resnet34, and a weight-decay of 1e-2. We searched for a  
644 fitting learning rate using the learn.lr\_find() method, and picked a learning rate of 1e-4.  
645 The model was trained using the fit\_one\_cycle() method for 20 epochs at slice(1e-4)  
646 and pct\_start=0.3. We unfroze all layers and searched for a learning rate again. The  
647 whole model was trained using the fit\_one\_cycle() method for 100 epochs at slice(1e-4)  
648 and pct\_start=0.3. As a result, the accuracy (number of correctly classified pixels/total  
649 number of pixels) reached >90 % using the test data (**Extended Data Fig. 3**). The  
650 trained U-Net deep-learning model was used to process bright-field droplet images into  
651 binary segmented images, in which white and black regions indicate the droplets and  
652 background, respectively. The binary segmented images were provided for particle  
653 analysis using ImageJ, and the particle analysis results were redirected to corresponding  
654 fluorescence images. Using the deep-learning-assisted automated analysis pipeline, we  
655 could automatically obtain the area, mean fluorescence intensity, minimum fluorescence



656 intensity, maximum fluorescence intensity, integrated density, and centroid of each  
657 droplet in a scalable and objective manner. The codes were described in  
658 **Supplementary Information 5.**

659

### 660 **Sensitivity calculation of the deep-learning-assisted automated femtoliter droplet** 661 **assay**

662 We roughly estimated the sensitivity of our femtoliter droplet assay using the data at  
663 49 pM artificial ribosomes (dilution ratio  $10^5$ ) (**Fig. 2c** and **Extended Data Fig. 6**). In  
664 this experiment, a droplet with a diameter of 1  $\mu\text{m}$  was expected to contain an average  
665 of  $1.54 \times 10^{-2}$  ribosomes. From the Poisson distribution formula, the probability that a  
666 1- $\mu\text{m}$  droplet would contain  $k$  ribosomes was expressed as follows:

667

$$668 \quad P(k, \lambda) = \frac{\lambda^k e^{-\lambda}}{k!},$$

669

670 where  $k$  is the number of ribosomes and  $\lambda$  is  $1.54 \times 10^{-2}$ . According to this  
671 formula, the ratios of droplets that contain zero, one, or two or more ribosomes were  
672 0.9847, 0.0152, or 0.0001, respectively.

673 In the data at 49 pM artificial ribosomes (dilution ratio  $10^5$ ), we observed 15544  
674 droplets with a diameter of 0.5–1.5  $\mu\text{m}$ , and the number of fluorescent droplets among  
675 them was 17. The observed ratio of the fluorescent droplets was 0.0011. Taken together,  
676 most of the fluorescent droplets (89%) were estimated to contain only a single artificial  
677 ribosome.

678

### 679 **Mass spectrometric analysis**

680 The proteomic analysis was carried out as previously described with modifications<sup>66</sup>.  
681 Briefly, the CF-TXTL reaction solutions were reduced by 50 mM dithiothreitol and  
682 modified with 50 mM iodoacetamide. For stable isotope labeling<sup>67</sup>, we used CF-TXTL  
683 reaction solutions with 20 amino acid mixtures containing stable isotope-labeled  
684 (heavy) L-arginine (<sup>13</sup>C<sub>6</sub>, <sup>15</sup>N<sub>4</sub>) and L-lysine (<sup>13</sup>C<sub>6</sub>, <sup>15</sup>N<sub>2</sub>) (Thermo Fisher Scientific)  
685 instead of unlabeled (light) L-arginine and L-lysine. The proteins were digested with  
686 sequencing-grade modified trypsin (Promega Corporation, Madison, WI, USA). The  
687 peptides were analyzed using a nano LC–MS system (UltiMate™ 3000 RSLCnano and  
688 Orbitrap Exploris™ 240) equipped with an Aurora UHPLC column  
689 (AUR2-25075C18A; IonOpticks, Fitzroy, Australia). A gradient was produced by  
690 changing the mixing ratio of the two eluents: A, 0.1 % (v/v) formic acid and B,  
691 acetonitrile. The gradient started with 5 % B with a 10-min hold, was then increased to  
692 45 % B for 60 min, and finally increased to 95 % B for a 10-min hold, following which  
693 the mobile phase was immediately adjusted to its initial composition and held for  
694 10 min to re-equilibrate the column. The autosampler and column oven were maintained  
695 at 4 °C and 40 °C, respectively. The separated peptides were detected on the MS with a  
696 full-scan range of 300–2000 m/z (resolution of 240,000) in the positive mode followed  
697 by data-dependent MS/MS scans (resolution of 15,000). The method was set to  
698 automatically analyze the top 20 most intense ions observed in the MS scan. The ESI  
699 voltage, dynamic exclusion, ion-transfer tube temperature, and normalized collision  
700 energy were 2 kV, 30 s, 275 °C, and 30 %, respectively. The mass spectrometry data  
701 were analyzed using Proteome Discoverer 2.5 (Thermo Fisher Scientific). The protein  
702 identification was performed using Sequest HT against the protein database of *E. coli*  
703 DH5α (accession number PRJNA429943) with a precursor mass tolerance of 10 ppm, a

704 fragment ion mass tolerance of 0.02 Da, and strict specificity allowing for up to 2  
705 missed cleavage. Cysteine carbamidomethylation was set as a fixed modification.  
706 L-arginine ( $^{13}\text{C}_6$ ,  $^{15}\text{N}_4$ ), L-lysine ( $^{13}\text{C}_6$ ,  $^{15}\text{N}_2$ ), methionine oxidation, N-terminus  
707 acetylation, and N-terminal methionine loss were set as dynamic modifications. The  
708 data were then filtered at a q-value  $\leq 0.01$  corresponding to a 1 % false discovery rate  
709 on a spectral level.

710

### 711 **Data and code availability**

712 MS data generated in this study are available in the jPOST repository<sup>68</sup> (jPOST ID  
713 JPST001809). The source data are shown in **Supplementary Information 4**. The codes  
714 used in the study are shown in **Supplementary Information 5**. The other datasets  
715 generated during the current study are available from the corresponding author.

716

## 717 **Acknowledgments**

718 The authors would like to thank Kei Fujiwara for useful discussions. This work was  
719 supported by JSPS KAKENHI (grant number 19K16109 and 26830139 to W.A.), JSPS  
720 Research Fellowship for Young Scientists (grant number 22J22251 to Y.K.), JST  
721 FOREST (grant number JPMJFR204K to W.A.), Sugiyama Chemical & Industrial  
722 Laboratory (<http://www.sugiyama-c-i-l.or.jp/> to W.A.), and the JGC-S Scholarship  
723 Foundation (<https://www.jgcs.or.jp/en/> to W.A.). The funders did not have any role in  
724 the study design, data collection and analysis, decision to publish, or preparation of the  
725 manuscript.

726

## 727 **Author contributions**

728 W.A. conceived the project. Y.K., Y.M., and W.A. designed the research; Y.K., Y.M.,  
729 and W.A. acquired and analyzed the data; S.A. contributed to mass spectrometric  
730 analysis; Y.K., Y.M., and M.M. contributed to the preparation of cell extracts; M.F.  
731 contributed to developing the droplet assay; M.U. advised the research. The manuscript  
732 was prepared by Y.K., Y.M., and W.A. and edited by all coauthors.

733

## 734 **Competing interest declaration**

735 Kyoto University have filed a patent application on *in vitro* ribosome biogenesis (by  
736 Y.K. and W.A.). The competing interest do not alter our adherence to the journal  
737 policies on sharing data and materials. The other authors declare no competing interests.

738

## 739 **Additional information**

## 740 **Supplementary information**

741 Supplementary Information 1. oSD-oASD pairs used in this study

742 Supplementary Information 2. Strains and plasmids used in this study

743 Supplementary Information 3. Reaction solution constituents for CF-TXTL

744 Supplementary Information 4. Source data

745 Supplementary Information 5. Codes for U-Net deep-learning and ImageJ analysis

746

747 **Corresponding author**

748 Correspondence and requests for materials should be addressed to Wataru Aoki.

749 Tel: +81-75-753-6495

750 E-mail address: [aoki.wataru.6a@kyoto-u.ac.jp](mailto:aoki.wataru.6a@kyoto-u.ac.jp)

751

752 **References**

- 753 1. Kaczanowska, M. & Rydén-Aulin, M. Ribosome biogenesis and the translation  
754 process in *Escherichia coli*. *Microbiol. Mol. Biol. Rev.* **71**, 477–494 (2007).
- 755 2. Shajani, Z., Sykes, M. T. & Williamson, J. R. Assembly of bacterial ribosomes.  
756 *Annu. Rev. Biochem.* **80**, 501–526 (2011).
- 757 3. Rodgers, M. L. & Woodson, S. A. A roadmap for rRNA folding and assembly  
758 during transcription. *Trends Biochem. Sci.* **46**, 889–901 (2021).
- 759 4. Jewett, M. C., Fritz, B. R., Timmerman, L. E. & Church, G. M. *In vitro* integration  
760 of ribosomal RNA synthesis, ribosome assembly, and translation. *Mol. Syst. Biol.* **9**,  
761 678 (2013).
- 762 5. Fritz, B. R. & Jewett, M. C. The impact of transcriptional tuning on *in vitro*  
763 integrated rRNA transcription and ribosome construction. *Nucleic Acids Res.* **42**,  
764 6774–6785 (2014).

- 765 6. Jewett, M. C. & Swartz, J. R. Mimicking the *Escherichia coli* cytoplasmic  
766 environment activates long-lived and efficient cell-free protein synthesis.  
767 *Biotechnol. Bioeng.* **86**, 19–26 (2004).
- 768 7. Szostak, J. W., Bartel, D. P. & Luisi, P. L. Synthesizing life. *Nature* **409**, 387–390  
769 (2001).
- 770 8. Wang, K., Neumann, H., Peak-Chew, S. Y. & Chin, J. W. Evolved orthogonal  
771 ribosomes enhance the efficiency of synthetic genetic code expansion. *Nat.*  
772 *Biotechnol.* **25**, 770–777 (2007).
- 773 9. Orelle, C. *et al.* Protein synthesis by ribosomes with tethered subunits. *Nature* **524**,  
774 119–124 (2015).
- 775 10. Schmied, W. H. *et al.* Controlling orthogonal ribosome subunit interactions  
776 enables evolution of new function. *Nature* **564**, 444–448 (2018).
- 777 11. Murase, Y., Nakanishi, H., Tsuji, G., Sunami, T. & Ichihashi, N. *In Vitro*  
778 Evolution of Unmodified 16S rRNA for Simple Ribosome Reconstitution. *ACS*  
779 *Synth. Biol.* **7**, 576–583 (2018).
- 780 12. Hammerling, M. J. *et al.* *In vitro* ribosome synthesis and evolution through  
781 ribosome display. *Nat. Commun.* **11**, 1108 (2020).
- 782 13. Talkington, M. W. T., Siuzdak, G. & Williamson, J. R. An assembly landscape for  
783 the 30S ribosomal subunit. *Nature* **438**, 628–632 (2005).
- 784 14. Adilakshmi, T., Bellur, D. L. & Woodson, S. A. Concurrent nucleation of 16S  
785 folding and induced fit in 30S ribosome assembly. *Nature* **455**, 1268–1272 (2008).
- 786 15. Mulder, A. M. *et al.* Visualizing ribosome biogenesis: parallel assembly pathways  
787 for the 30S subunit. *Science* **330**, 673–677 (2010).

- 788 16. Kim, H. *et al.* Protein-guided RNA dynamics during early ribosome assembly.  
789 *Nature* **506**, 334–338 (2014).
- 790 17. Davis, J. H. *et al.* Modular Assembly of the Bacterial Large Ribosomal Subunit.  
791 *Cell* **167**, 1610-1622.e15 (2016).
- 792 18. Rodgers, M. L. & Woodson, S. A. Transcription Increases the Cooperativity of  
793 Ribonucleoprotein Assembly. *Cell* **179**, 1370-1381.e12 (2019).
- 794 19. Duss, O., Stepanyuk, G. A., Puglisi, J. D. & Williamson, J. R. Transient  
795 Protein-RNA Interactions Guide Nascent Ribosomal RNA Folding. *Cell* **179**,  
796 1357-1369.e16 (2019).
- 797 20. Rabuck-Gibbons, J. N., Lyumkis, D. & Williamson, J. R. Quantitative mining of  
798 compositional heterogeneity in cryo-EM datasets of ribosome assembly  
799 intermediates. *Structure* **30**, 498-509.e4 (2022).
- 800 21. Nikolay, R. *et al.* Snapshots of native pre-50S ribosomes reveal a biogenesis factor  
801 network and evolutionary specialization. *Mol. Cell* **81**, 1200-1215.e9 (2021).
- 802 22. Li, N. *et al.* Cryo-EM structures of the late-stage assembly intermediates of the  
803 bacterial 50S ribosomal subunit. *Nucleic Acids Res.* **41**, 7073–7083 (2013).
- 804 23. Champney, W. S. Kinetics of ribosome synthesis during a nutritional shift-up in  
805 *Escherichia coli* K-12. *Mol. Gen. Genet.* **152**, 259–266 (1977).
- 806 24. Kampen, K. R., Sulima, S. O., Vereecke, S. & De Keersmaecker, K. Hallmarks of  
807 ribosomopathies. *Nucleic Acids Res.* **48**, 1013–1028 (2020).
- 808 25. Mizushima, S. & Nomura, M. Assembly mapping of 30S ribosomal proteins from  
809 *E. coli*. *Nature* **226**, 1214 (1970).
- 810 26. Röhl, R. & Nierhaus, K. H. Assembly map of the large subunit (50S) of  
811 *Escherichia coli* ribosomes. *Proc. Natl. Acad. Sci. U. S. A.* **79**, 729–733 (1982).

- 812 27. Culver, G. M. & Noller, H. F. Efficient reconstitution of functional *Escherichia*  
813 *coli* 30S ribosomal subunits from a complete set of recombinant small subunit  
814 ribosomal proteins. *RNA* **5**, 832–843 (1999).
- 815 28. Shimojo, M. *et al.* *In vitro* reconstitution of functional small ribosomal subunit  
816 assembly for comprehensive analysis of ribosomal elements in *E. coli*. *Commun*  
817 *Biol* **3**, 142 (2020).
- 818 29. Aoyama, R. *et al.* *In vitro* reconstitution of the *Escherichia coli* 70S ribosome with  
819 a full set of recombinant ribosomal proteins. *J. Biochem.* **171**, 227–237 (2022).
- 820 30. Li, J. *et al.* Cogenerating Synthetic Parts toward a Self-Replicating System. *ACS*  
821 *Synth. Biol.* **6**, 1327–1336 (2017).
- 822 31. Levy, M., Falkovich, R., Daube, S. S. & Bar-Ziv, R. H. Autonomous synthesis and  
823 assembly of a ribosomal subunit on a chip. *Sci Adv* **6**, eaaz6020 (2020).
- 824 32. Shine, J. & Dalgarno, L. The 3'-terminal sequence of *Escherichia coli* 16S  
825 ribosomal RNA: complementarity to nonsense triplets and ribosome binding sites.  
826 *Proc. Natl. Acad. Sci. U. S. A.* **71**, 1342–1346 (1974).
- 827 33. Hui, A. & de Boer, H. A. Specialized ribosome system: preferential translation of a  
828 single mRNA species by a subpopulation of mutated ribosomes in *Escherichia coli*.  
829 *Proc. Natl. Acad. Sci. U. S. A.* **84**, 4762–4766 (1987).
- 830 34. Rackham, O. & Chin, J. W. A network of orthogonal ribosome x mRNA pairs. *Nat.*  
831 *Chem. Biol.* **1**, 159–166 (2005).
- 832 35. Chubiz, L. M. & Rao, C. V. Computational design of orthogonal ribosomes.  
833 *Nucleic Acids Res.* **36**, 4038–4046 (2008).
- 834 36. Carlson, E. D. *et al.* Engineered ribosomes with tethered subunits for expanding  
835 biological function. *Nat. Commun.* **10**, 3920 (2019).



- 836 37. Sigmund, C. D., Ettayebi, M. & Morgan, E. A. Antibiotic resistance mutations in  
837 16S and 23S ribosomal RNA genes of *Escherichia coli*. *Nucleic Acids Res.* **12**,  
838 4653–4663 (1984).
- 839 38. Rondelez, Y. *et al.* Microfabricated arrays of femtoliter chambers allow single  
840 molecule enzymology. *Nat. Biotechnol.* **23**, 361–365 (2005).
- 841 39. Ronneberger, O., Fischer, P. & Brox, T. U-Net: Convolutional Networks for  
842 Biomedical Image Segmentation. in *Medical Image Computing and*  
843 *Computer-Assisted Intervention – MICCAI 2015* 234–241 (Springer International  
844 Publishing, 2015).
- 845 40. Schneider, C. A., Rasband, W. S. & Eliceiri, K. W. NIH Image to ImageJ: 25 years  
846 of image analysis. *Nat. Methods* **9**, 671–675 (2012).
- 847 41. Marshall, R. & Noireaux, V. Quantitative modeling of transcription and translation  
848 of an all-*E. coli* cell-free system. *Sci. Rep.* **9**, 11980 (2019).
- 849 42. Cochella, L. & Green, R. Isolation of antibiotic resistance mutations in the rRNA  
850 by using an *in vitro* selection system. *Proc. Natl. Acad. Sci. U. S. A.* **101**,  
851 3786–3791 (2004).
- 852 43. Chumpolkulwong, N. *et al.* Effects of *Escherichia coli* ribosomal protein S12  
853 mutations on cell-free protein synthesis. *Eur. J. Biochem.* **271**, 1127–1134 (2004).
- 854 44. Subramanian, A. R. & van Duin, J. Exchange of individual ribosomal proteins  
855 between ribosomes as studied by heavy isotope-transfer experiments. *Mol. Gen.*  
856 *Genet.* **158**, 1–9 (1977).
- 857 45. Kaguni, J. M. & Kornberg, A. Replication initiated at the origin (*oriC*) of the *E.*  
858 *coli* chromosome reconstituted with purified enzymes. *Cell* **38**, 183–190 (1984).

- 859 46. Su'etsugu, M., Takada, H., Katayama, T. & Tsujimoto, H. Exponential  
860 propagation of large circular DNA by reconstitution of a chromosome-replication  
861 cycle. *Nucleic Acids Res.* **45**, 11525–11534 (2017).
- 862 47. Chamberlin, M. & Berg, P. Deoxyribonucleic acid-directed synthesis of ribonucleic  
863 acid by an enzyme from *Escherichia coli*. *Proc. Natl. Acad. Sci. U. S. A.* **48**, 81–94  
864 (1962).
- 865 48. Nirenberg, M. W. & Matthaei, J. H. The dependence of cell-free protein synthesis  
866 in *E. coli* upon naturally occurring or synthetic polyribonucleotides. *Proc. Natl.*  
867 *Acad. Sci. U. S. A.* **47**, 1588–1602 (1961).
- 868 49. Shimizu, Y. *et al.* Cell-free translation reconstituted with purified components. *Nat.*  
869 *Biotechnol.* **19**, 751–755 (2001).
- 870 50. Datsenko, K. A. & Wanner, B. L. One-step inactivation of chromosomal genes in  
871 *Escherichia coli* K-12 using PCR products. *Proc. Natl. Acad. Sci. U. S. A.* **97**,  
872 6640–6645 (2000).
- 873 51. Boni, I. V., Isaeva, D. M., Musychenko, M. L. & Tzareva, N. V.  
874 Ribosome-messenger recognition: mRNA target sites for ribosomal protein S1.  
875 *Nucleic Acids Res.* **19**, 155–162 (1991).
- 876 52. Komarova, A. V., Tchufistova, L. S., Supina, E. V. & Boni, I. V. Protein S1  
877 counteracts the inhibitory effect of the extended Shine-Dalgarno sequence on  
878 translation. *RNA* **8**, 1137–1147 (2002).
- 879 53. Chen, S. S. & Williamson, J. R. Characterization of the ribosome biogenesis  
880 landscape in *E. coli* using quantitative mass spectrometry. *J. Mol. Biol.* **425**,  
881 767–779 (2013).

- 882 54. Sheahan, T. & Wieden, H.-J. Ribosomal Protein S1 Improves the Protein Yield of  
883 an *In Vitro* Reconstituted Cell-Free Translation System. *ACS Synth. Biol.* **11**,  
884 1004–1008 (2022).
- 885 55. Shilling, P. J. *et al.* Improved designs for pET expression plasmids increase protein  
886 production yield in *Escherichia coli*. *Commun Biol* **3**, 214 (2020).
- 887 56. Takahashi, S., Furusawa, H., Ueda, T. & Okahata, Y. Translation enhancer  
888 improves the ribosome liberation from translation initiation. *J. Am. Chem. Soc.* **135**,  
889 13096–13106 (2013).
- 890 57. Kwon, Y.-C. & Jewett, M. C. High-throughput preparation methods of crude  
891 extract for robust cell-free protein synthesis. *Sci. Rep.* **5**, 8663 (2015).
- 892 58. Fritz, B. R., Jamil, O. K. & Jewett, M. C. Implications of macromolecular  
893 crowding and reducing conditions for *in vitro* ribosome construction. *Nucleic Acids*  
894 *Res.* **43**, 4774–4784 (2015).
- 895 59. Kempf, N. *et al.* A Novel Method to Evaluate Ribosomal Performance in Cell-Free  
896 Protein Synthesis Systems. *Sci. Rep.* **7**, 46753 (2017).
- 897 60. Umezawa, H. *et al.* A NEW ANTIBIOTIC, KASUGSMYCIN. *J. Antibiot.* **18**,  
898 101–103 (1965).
- 899 61. Schluenzen, F. *et al.* The antibiotic kasugamycin mimics mRNA nucleotides to  
900 destabilize tRNA binding and inhibit canonical translation initiation. *Nat. Struct.*  
901 *Mol. Biol.* **13**, 871–878 (2006).
- 902 62. Griffiths, A. D. & Tawfik, D. S. Directed evolution of an extremely fast  
903 phosphotriesterase by *in vitro* compartmentalization. *EMBO J.* **22**, 24–35 (2003).
- 904 63. Murzabaev, M. *et al.* Handmade microfluidic device for biochemical applications  
905 in emulsion. *J. Biosci. Bioeng.* **121**, 471–476 (2016).

- 906 64. Berg, S. *et al.* ilastik: interactive machine learning for (bio)image analysis. *Nat.*  
907 *Methods* **16**, 1226–1232 (2019).
- 908 65. Howard, J. & Gugger, S. Fastai: A Layered API for Deep Learning. *Information* **11**,  
909 108 (2020).
- 910 66. Tsuji, T. *et al.* YAP1 mediates survival of ALK-rearranged lung cancer cells  
911 treated with alectinib via pro-apoptotic protein regulation. *Nat. Commun.* **11**, 74  
912 (2020).
- 913 67. Ong, S.-E. *et al.* Stable isotope labeling by amino acids in cell culture, SILAC, as a  
914 simple and accurate approach to expression proteomics. *Mol. Cell. Proteomics* **1**,  
915 376–386 (2002).
- 916 68. Okuda, S. *et al.* jPOSTrepo: an international standard data repository for  
917 proteomes. *Nucleic Acids Res.* **45**, D1107–D1111 (2017).
